# Supplementary material for: Reduced Carotenoid and Retinoid Concentrations and Altered Lycopene Isomer Ratio in Plasma of Atopic Dermatitis Patients
Source: PubMed Central journal article supplement (PMC6213761; doi:10.3390/nu10101390), 2018-10-01
Supplement: nutrients-10-01390-s001.pdf [file nutrients-10-01390-s001.pdf]

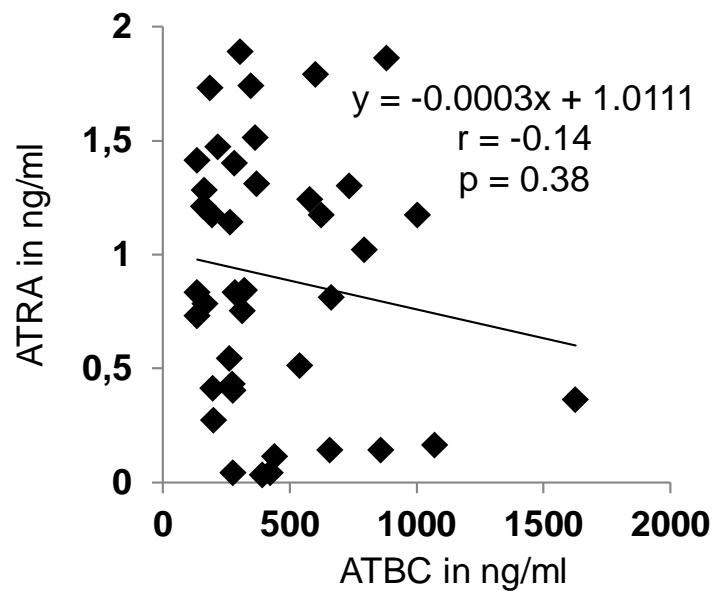

**Supplementary Figure1:** Displayed is an MS-Excel calculated graphical direct correlation of plasma levels of all-*trans*- $\beta$ -carotene (ATBC) and all-*trans*-retinoic acid (ATRA) plasma levels from  $n = 40$  individuals (healthy volunteers and AD-patients). R- and p-values were previously calculated using "R" and were displayed graphically in Figure 1 and indicate no significant correlation between these two variables.
